# Supplementary material for: Cytosolic aggregation of mitochondrial proteins disrupts cellular homeostasis by stimulating the aggregation of other proteins
Source: eLife. 2021 Jul 20;10:e65484. doi: 10.7554/eLife.65484 (PMC8457837; doi:10.7554/eLife.65484)
Supplement: Figure 4—source data 1. [file elife-65484-fig4-data1.xlsx]

## Sheet: Fig4 F - alfaSNCA-WT
	Number of aggregates per cell
Cell #	pam16WT 19C	pam16-3 19C	pam16WT 37C	pam16-3 37C
1	11	12	12	9
2	12	13	10	13
3	2	20	22	14
4	9	13	17	24
5	0	13	19	7
6	12	11	8	13
7	11	10	18	18
8	13	12	22	17
9	14	13	11	17
10	13	12	13	14
11	12	14	14	20
12	18	12	8	11
13	16	14	10	25
14	15	11	13	20
15	21	13	7	18
16	22	15	14	11
17	9	12	9	18
18	9	25	9	19
19	22	19	11	24
20	6	6	13	23
21	15	14	7	15
22	24	14	18	7
23	24	9	9	13
24	7	12	13	17
25	11	19	15	9
26	12	14	11	14
27	11	24	16	13
28	24	24	20	11
29	22	23	11	2
30	26	20	13	12
31	12	17	13	17
32	14	8	24	12
33	8	11	13	10
34	4	14	11	13
35	0	24	11	12
36	8	16	14	15
37	10	8	15	14
38	16	6	23	17
39	7	13	22	10
40	10	21	11	13
41	3	13	11	18
42	7	21	15	28
43	4	11	17	15
44	6	13	17	20
45	11	5	9	16
46	3	5	5	16
47	8	19	13	11
48	10	11	10	21
49	17	6	11	27
50	12	7	13	14
51	16	5	19	16
52	11	5	17	11
53	15	16	10	18
54	20	14	14	14
55	18	15	16	12
56	13	12	16	10
57	2	13	12	6
58	0	1		19
59	20	23		14
60	13	14		14
61	15	15		16
62	7	24		12
63	8	24		16
64	12			23
65	16			17
66	10			20
67	9			15
68	7			17
69	3			17
70	2			19
71	2			21
72	15			18
73				11
74				14
75				19
76				7
77				12
78				16
79				23
80				12
81				13
82				10
83				12
	11.4861	13.8571	13.5965	15.1928	Average
	72	63	57	83	Cell in total
	0.742502	0.70554	0.567326	0.526675	SEM

## Sheet: Fig4 G - alfaSNCA-A53T
	Number of aggregates per cell
Cell #	pam16WT 19C	pam16-3 19C	pam16WT 37C	pam16-3 37C
1	2	18	13	16
2	6	11	10	12
3	6	7	12	4
4	13	5	10	14
5	3	7	11	8
6	3	10	11	10
7	5	10	12	2
8	3	8	14	6
9	4	11	11	14
10	4	6	8	11
11	6	15	9	5
12	3	3	20	10
13	4	9	10	14
14	2	10	7	7
15	2	21	11	21
16	9	6	3	3
17	4	10	18	7
18	5	3	5	16
19	9	7	19	17
20	3	8	12	11
21	8	17	16	8
22	8	14	9	3
23	2	6	11	9
24	5	8	5	4
25	3	7	4	9
26	6	4	13	4
27	4	3	5	10
28	3	9	9	9
29	4	7	18	8
30	6	7	8	15
31	2	8	10	14
32	4	10	8	11
33	2	8	14	11
34	2	15	12	2
35	4	10	6	7
36	4	9	4	6
37	4	5	14	17
38	10	10	12	12
39	14	6	6	3
40	9	13	7	8
41	14	10	13	7
42	12	3	10	9
43	3	3	7	15
44	6	7	19	5
45	3	10	9	13
46	5	5	11	14
47	3	3	7	9
48	4	4	6	14
49	2	6	3	14
50	5	15	9	10
51	4	5	15	10
52	7	9	9	13
53	5	6	11	6
54	11	12	8	7
55	2	8	6	6
56	2	3	4	2
57	14	10	5	10
58	2	17	6	15
59	2	9	9	7
60	2	12	7	11
61	5	6	13	7
62	5	6	5	23
63	7	12	15	5
64	10	3	6	5
65	14	8	4	2
66	13	9	14	10
67	14	7	5	6
68	3	9	11	6
69	6	3	5	5
70	1	4	10	18
71	9	6	4	10
72	11	4	11	15
73	5	4	6	7
74	6	3	9	4
75	1	8		11
76	5	11		3
77	9	4		6
78	5	7		5
79	3	9		12
80	3	7		9
81	6	10		15
82	6	10		19
83	5	7		15
84	6	4		8
85	5	3		6
86	4	12		9
87	5	7		5
88	5	6		20
89	10	9		5
90	6	7		18
91	4	10		12
92	9	12		16
93	5	7		20
94	13	4		9
95	3	5		13
96	9	10		8
97	9	8		7
98	4	2		13
99	4	4		7
100	5	12		7
101	5	10		7
102	4	6		9
103	7	4		7
104	4	1		11
105	5	13
106	6	8
107	1	7
108	6	5
109	1	5
110	1	7
111	9	7
112	11	10
113	7	4
114	2	9
115	1	1
116	5	11
117	2	4
118	1	4
119	2	13
120	6
121	10
122	6
123	5
	5.47154	7.78151	9.58108	9.71154	Average
	123	119	74	104	Cell in total
	0.29879	0.339304	0.473169	0.460269	SEM

## Sheet: Figure 4- fig supp 1F and 1G
	Avarage aggregate size (µm)
Cell #	pam16WT 19C	pam16-3 19C	pam16WT 37C	pam16-3 37C
1	0.111	0.096	0.124	0.143
2	0.119	0.108	0.104	0.128
3	0.082	0.102	0.127	0.097
4	0.107	0.102	0.097	0.151
5	0.098	0.115	0.164	0.091
6	0.119	0.119	0.1	0.122
7	0.117	0.114	0.138	0.188
8	0.101	0.109	0.082	0.158
9	0.191	0.138	0.108	0.097
10	0.119	0.097	0.095	0.13
Average	0.1164	0.11	0.1139	0.1305
SD	0.0273174	0.0118491	0.023132	0.0291933
