# Supplementary material for: Cytosolic aggregation of mitochondrial proteins disrupts cellular homeostasis by stimulating the aggregation of other proteins
Source: eLife. 2021 Jul 20;10:e65484. doi: 10.7554/eLife.65484 (PMC8457837; doi:10.7554/eLife.65484)
Supplement: Figure 5—source data 1. [file elife-65484-fig5-data1.xlsx]

## Sheet: day0 RFP
Control							dnj-21 RNAi
Slice	Count	Total Area	Average Size	%Area	Mean
Image 1_Maximum intensity projection_C0.tif	0	0	0	0	NaN		Image 18_Maximum intensity projection_C0.tif	0	0	0	0	NaN	t-Test: Two-Sample Assuming Unequal Variances
Image 2_Maximum intensity projection_C0.tif	0	0	0	0	NaN		Image 19_Maximum intensity projection_C0.tif	2	0.195	0.098	0.0007629	32
Image 3_Maximum intensity projection_C0.tif	0	0	0	0	NaN		Image 20_Maximum intensity projection_C0.tif	0	0	0	0	NaN		Variable 1	Variable 2
Image 4_Maximum intensity projection_C0.tif	0	0	0	0	NaN		Image 21_Maximum intensity projection_C0.tif	0	0	0	0	NaN	Mean	0.4	2.625
Image 6_Maximum intensity projection_C0.tif	0	0	0	0	NaN		Image 22_Maximum intensity projection_C0.tif	0	0	0	0	NaN	Variance	0.828571	30.25
Image 7_Maximum intensity projection_C0.tif	0	0	0	0	NaN		Image 23_Maximum intensity projection_C0.tif	0	0	0	0	NaN	Observations	15	16
Image 8_Maximum intensity projection_C0.tif	1	0.098	0.098	0.0003815	33		Image 24_Maximum intensity projection_C0.tif	2	1.173	0.586	0.005	33.556	Hypothesized Mean Difference	0
Image 9_Maximum intensity projection_C0.tif	0	0	0	0	NaN		Image 25_Maximum intensity projection_C0.tif	0	0	0	0	NaN	df	16
Image 10_Maximum intensity projection_C0.tif	0	0	0	0	NaN		Image 26_Maximum intensity projection_C0.tif	0	0	0	0	NaN	t Stat	-1.59505
Image 11_Maximum intensity projection_C0.tif	2	0.684	0.342	0.003	32.1		Image 27_Maximum intensity projection_C0.tif	18	3.908	0.217	0.015	32.278	P(T<=t) one-tail	0.0651308
Image 13_Maximum intensity projection_C0.tif	0	0	0	0	NaN		Image 28_Maximum intensity projection_C0.tif	1	0.098	0.098	0.0003815	30	t Critical one-tail	1.74588
Image 14_Maximum intensity projection_C0.tif	3	0.782	0.261	0.003	33.667		Image 29_Maximum intensity projection_C0.tif	15	5.569	0.371	0.022	36.924	P(T<=t) two-tail	0.130262
Image 15_Maximum intensity projection_C0.tif	0	0	0	0	NaN		Image 30_Maximum intensity projection_C0.tif	1	1.075	1.075	0.004	35.545	t Critical two-tail	2.11991
Image 16_Maximum intensity projection_C0.tif	0	0	0	0	NaN		Image 31_Maximum intensity projection_C0.tif	2	0.782	0.391	0.003	34.786
Image 17_Maximum intensity projection_C0.tif	0	0	0	0	NaN		Image 32_Maximum intensity projection_C0.tif	1	0.195	0.195	0.0007629	30
Average	0.4		0.0467333				Image 33_Maximum intensity projection_C0.tif	0	0	0	0	NaN
SD	0.879394		0.1039					2.625		0.189437			t-Test: Two-Sample Assuming Unequal Variances
SEM	0.227058		0.0268269					5.32535		0.287193
								1.33134		0.0717983				Variable 1	Variable 2
													Mean	0.0467333	0.189437
													Variance	0.0115664	0.0879787
													Observations	15	16
													Hypothesized Mean Difference	0
													df	19
													t Stat	-1.80223
													P(T<=t) one-tail	0.0436983
													t Critical one-tail	1.72913
													P(T<=t) two-tail	0.0873966
													t Critical two-tail	2.09302

## Sheet: day1 RFP
Control							dnj-21 RNAi
Slice	Count	Total Area	Average Size	%Area	Mean	Day1
Image 1_Maximum intensity projection_C0.tif	423	129.856	0.307	0.507	49.041		Image 16_Maximum intensity projection_C0.tif	6	2.15	0.358	0.008	38.411	t-Test: Two-Sample Assuming Unequal Variances
Image 2_Maximum intensity projection_C0.tif	28	4.201	0.15	0.016	35.571		Image 17_Maximum intensity projection_C0.tif	42	5.96	0.142	0.023	41.29
Image 3_Maximum intensity projection_C0.tif	218	62.436	0.286	0.244	45.628		Image 18_Maximum intensity projection_C0.tif	5	0.586	0.117	0.002	37		Variable 1	Variable 2
Image 4_Maximum intensity projection_C0.tif	112	25.6	0.229	0.1	44.938		Image 19_Maximum intensity projection_C0.tif	64	10.65	0.166	0.042	41.374	Mean	212.571	37.7857
Image 5_Maximum intensity projection_C0.tif	65	14.07	0.216	0.055	43.208		Image 20_Maximum intensity projection_C0.tif	23	3.029	0.132	0.012	35.065	Variance	18383.5	1268.03
Image 6_Maximum intensity projection_C0.tif	198	53.252	0.269	0.208	41.015		Image 21_Maximum intensity projection_C0.tif	55	11.041	0.201	0.043	41.878	Observations	14	14
Image 7_Maximum intensity projection_C0.tif	200	42.21	0.211	0.165	43.871		Image 22_Maximum intensity projection_C0.tif	10	4.006	0.401	0.016	34.083	Hypothesized Mean Difference	0
Image 8_Maximum intensity projection_C0.tif	393	137.672	0.35	0.537	47.437		Image 23_Maximum intensity projection_C0.tif	10	1.27	0.127	0.005	39.15	df	15
Image 9_Maximum intensity projection_C0.tif	210	51.493	0.245	0.201	44.272		Image 24_Maximum intensity projection_C0.tif	9	1.466	0.163	0.006	37.796	t Stat	4.66522
Image 10_Maximum intensity projection_C0.tif	444	120.573	0.272	0.471	49.098		Image 25_Maximum intensity projection_C0.tif	8	0.782	0.098	0.003	32.75	P(T<=t) one-tail	0.00015248
Image 11_Maximum intensity projection_C0.tif	227	47.194	0.208	0.184	41.369		Image 26_Maximum intensity projection_C0.tif	94	18.174	0.193	0.071	41.649	t Critical one-tail	1.75305
Image 12_Maximum intensity projection_C0.tif	18	2.638	0.147	0.01	37.796		Image 27_Maximum intensity projection_C0.tif	34	5.863	0.172	0.023	37.889	P(T<=t) two-tail	0.000304959
Image 14_Maximum intensity projection_C0.tif	265	74.357	0.281	0.29	46.495		Image 28_Maximum intensity projection_C0.tif	119	26.577	0.223	0.104	44.707	t Critical two-tail	2.13145
Image 15_Maximum intensity projection_C0.tif	175	38.302	0.219	0.15	43.487		Image 30_Maximum intensity projection_C0.tif	50	8.696	0.174	0.034	37.02
Average	212.571		0.242143					37.7857		0.1905
SD	130.654		0.0547486					34.3141		0.0842087
SEM	34.9187		0.0146322					9.17082		0.0225057			t-Test: Two-Sample Assuming Unequal Variances
														Variable 1	Variable 2
													Mean	0.242143	0.1905
													Variance	0.00322798	0.00763658
													Observations	14	14
													Hypothesized Mean Difference	0
													df	22
													t Stat	1.85382
													P(T<=t) one-tail	0.0386109
													t Critical one-tail	1.71714
													P(T<=t) two-tail	0.0772219
													t Critical two-tail	2.07387

## Sheet: day2 RFP
Control							dnj-21 RNAi
Slice	Count	Total Area	Average Size	%Area	Mean		Slice	Count	Total Area	Average Size	%Area	Mean
Image 1_Maximum intensity projection_C0.tif	584	237.14	0.406	0.926	50.901		Image 17_Maximum intensity projection_C0.tif	163	49.343	0.303	0.193	46.169	t-Test: Two-Sample Assuming Unequal Variances
Image 2_Maximum intensity projection_C0.tif	417	124.091	0.298	0.484	47.935		Image 18_Maximum intensity projection_C0.tif	412	143.926	0.349	0.562	54.161
Image 3_Maximum intensity projection_C0.tif	410	184.573	0.45	0.721	49.846		Image 19_Maximum intensity projection_C0.tif	347	113.147	0.326	0.442	49.972		Variable 1	Variable 2
Image 4_Maximum intensity projection_C0.tif	304	115.688	0.381	0.452	47.612		Image 20_Maximum intensity projection_C0.tif	200	58.919	0.295	0.23	54.077	Mean	506.438	303.062
Image 5_Maximum intensity projection_C0.tif	540	199.327	0.369	0.778	50.818		Image 21_Maximum intensity projection_C0.tif	166	38.497	0.232	0.15	45.227	Variance	28230.9	20271.3
Image 6_Maximum intensity projection_C0.tif	562	193.758	0.345	0.756	51.467		Image 22_Maximum intensity projection_C0.tif	95	19.346	0.204	0.076	38.738	Observations	16	16
Image 7_Maximum intensity projection_C0.tif	741	306.123	0.413	1.195	54.27		Image 23_Maximum intensity projection_C0.tif	267	96.732	0.362	0.378	50.899	Hypothesized Mean Difference	0
Image 8_Maximum intensity projection_C0.tif	483	179.785	0.372	0.702	51.196		Image 24_Maximum intensity projection_C0.tif	310	71.425	0.23	0.279	46.287	df	29
Image 9_Maximum intensity projection_C0.tif	190	43.09	0.227	0.168	45.371		Image 25_Maximum intensity projection_C0.tif	500	151.938	0.304	0.593	53.413	t Stat	3.69383
Image 10_Maximum intensity projection_C0.tif	742	331.137	0.446	1.293	55.085		Image 26_Maximum intensity projection_C0.tif	221	73.575	0.333	0.287	47.285	P(T<=t) one-tail	0.000456184
Image 11_Maximum intensity projection_C0.tif	712	293.812	0.413	1.147	54.264		Image 27_Maximum intensity projection_C0.tif	340	123.602	0.364	0.483	51.212	t Critical one-tail	1.69913
Image 12_Maximum intensity projection_C0.tif	435	129.758	0.298	0.507	50.776		Image 28_Maximum intensity projection_C0.tif	302	92.628	0.307	0.362	47.514	P(T<=t) two-tail	0.000912369
Image 13_Maximum intensity projection_C0.tif	565	276.517	0.489	1.08	53.938		Image 29_Maximum intensity projection_C0.tif	247	68.787	0.278	0.269	49.573	t Critical two-tail	2.04523
Image 14_Maximum intensity projection_C0.tif	352	90.87	0.258	0.355	46.738		Image 30_Maximum intensity projection_C0.tif	324	99.761	0.308	0.389	50.476
Image 15_Maximum intensity projection_C0.tif	717	319.119	0.445	1.246	51.56		Image 31_Maximum intensity projection_C0.tif	271	75.627	0.279	0.295	46.401
Image 16_Maximum intensity projection_C0.tif	349	129.856	0.372	0.507	50.03		Image 32_Maximum intensity projection_C0.tif	684	243.492	0.356	0.951	50.142
Average	506.438		0.373875				Average	303.062		0.301875			t-Test: Two-Sample Assuming Unequal Variances
SD	162.685		0.0710773				SD	137.856		0.0467799
SEM	40.6713		0.0177693				SEM	34.464		0.011695				Variable 1	Variable 2
													Mean	0.373875	0.301875
													Variance	0.00538878	0.00233425
													Observations	16	16
													Hypothesized Mean Difference	0
													df	26
													t Stat	3.27717
													P(T<=t) one-tail	0.00148675
													t Critical one-tail	1.70562
													P(T<=t) two-tail	0.00297349
													t Critical two-tail	2.05553

## Sheet: day3 RFP
Control							dnj-21 RNAi
Slice	Count	Total Area	Average Size	%Area	Mean
Image 1_Maximum intensity projection_C0.tif	669	305.635	0.457	1.193	57.432		Image 17_Maximum intensity projection_C0.tif	342	146.173	0.427	0.571	52.264	t-Test: Two-Sample Assuming Unequal Variances
Image 2_Maximum intensity projection_C0.tif	685	305.048	0.445	1.191	54.949		Image 18_Maximum intensity projection_C0.tif	288	111.877	0.388	0.437	48.279
Image 3_Maximum intensity projection_C0.tif	419	164.933	0.394	0.644	51.494		Image 19_Maximum intensity projection_C0.tif	230	73.673	0.32	0.288	51.266		Variable 1	Variable 2
Image 4_Maximum intensity projection_C0.tif	659	284.139	0.431	1.109	56.079		Image 20_Maximum intensity projection_C0.tif	216	72.207	0.334	0.282	51.226	Mean	623.125	387
Image 5_Maximum intensity projection_C0.tif	542	237.824	0.439	0.928	57.866		Image 21_Maximum intensity projection_C0.tif	399	138.552	0.347	0.541	56.611	Variance	8469.98	10416.6
Image 6_Maximum intensity projection_C0.tif	471	150.375	0.319	0.587	50.682		Image 22_Maximum intensity projection_C0.tif	617	252.09	0.409	0.984	58.3	Observations	16	15
Image 7_Maximum intensity projection_C0.tif	750	404.81	0.54	1.58	58.722		Image 23_Maximum intensity projection_C0.tif	438	154.478	0.353	0.603	49.449	Hypothesized Mean Difference	0
Image 8_Maximum intensity projection_C0.tif	727	329.573	0.453	1.287	53.962		Image 24_Maximum intensity projection_C0.tif	475	174.802	0.368	0.682	52.23	df	28
Image 9_Maximum intensity projection_C0.tif	712	345.012	0.485	1.347	57.837		Image 25_Maximum intensity projection_C0.tif	463	155.358	0.336	0.607	51.086	t Stat	6.7497
Image 10_Maximum intensity projection_C0.tif	605	267.626	0.442	1.045	55.134		Image 26_Maximum intensity projection_C0.tif	430	190.435	0.443	0.743	59.097	P(T<=t) one-tail	1.24834e-07
Image 11_Maximum intensity projection_C0.tif	649	277.494	0.428	1.083	56.346		Image 27_Maximum intensity projection_C0.tif	384	147.15	0.383	0.574	49.637	t Critical one-tail	1.70113
Image 12_Maximum intensity projection_C0.tif	638	303.485	0.476	1.185	57.959		Image 28_Maximum intensity projection_C0.tif	407	150.081	0.369	0.586	52.19	P(T<=t) two-tail	2.49667e-07
Image 13_Maximum intensity projection_C0.tif	575	207.73	0.361	0.811	53.207		Image 30_Maximum intensity projection_C0.tif	444	159.852	0.36	0.624	58.581	t Critical two-tail	2.04841
Image 14_Maximum intensity projection_C0.tif	660	309.25	0.469	1.207	55.079		Image 31_Maximum intensity projection_C0.tif	325	109.728	0.338	0.428	49.378
Image 15_Maximum intensity projection_C0.tif	668	310.52	0.465	1.212	61.291		Image 32_Maximum intensity projection_C0.tif	347	100.25	0.289	0.391	47.893
Image 16_Maximum intensity projection_C0.tif	541	274.465	0.507	1.072	53.65		Average	387		0.364267
Average	623.125		0.444437				SD	98.6009		0.0396307			t-Test: Two-Sample Assuming Unequal Variances
SD	89.1101		0.051643				SEM	25.4586		0.0102326
SEM	22.2775		0.0129107											Variable 1	Variable 2
													Mean	0.444437	0.364267
													Variance	0.0028448	0.00168278
													Observations	16	15
													Hypothesized Mean Difference	0
													df	28
													t Stat	4.70791
													P(T<=t) one-tail	3.08123e-05
													t Critical one-tail	1.70113
													P(T<=t) two-tail	6.16245e-05
													t Critical two-tail	2.04841

## Sheet: day4 RFP
Control							dnj-21 RNAi
Slice	Count	Total Area	Average Size	%Area	Mean
Image 1_Maximum intensity projection_C0.tif	304	129.856	0.427	0.507	54.187		Image 16_Maximum intensity projection_C0.tif	281	110.9	0.395	0.433	51.272	t-Test: Two-Sample Assuming Unequal Variances
Image 2_Maximum intensity projection_C0.tif	669	346.184	0.517	1.352	59.929		Image 17_Maximum intensity projection_C0.tif	435	186.625	0.429	0.729	55.127
Image 3_Maximum intensity projection_C0.tif	568	257.464	0.453	1.005	57.004		Image 18_Maximum intensity projection_C0.tif	497	223.657	0.45	0.873	55.903		Variable 1	Variable 2
Image 4_Maximum intensity projection_C0.tif	526	299.772	0.57	1.17	63.286		Image 19_Maximum intensity projection_C0.tif	438	187.406	0.428	0.732	51.468	Mean	576.643	510.933
Image 5_Maximum intensity projection_C0.tif	446	238.508	0.535	0.931	58.171		Image 20_Maximum intensity projection_C0.tif	512	230.496	0.45	0.9	58.186	Variance	16119.2	12004.1
Image 6_Maximum intensity projection_C0.tif	711	413.31	0.581	1.614	61.535		Image 21_Maximum intensity projection_C0.tif	511	221.409	0.433	0.864	52.339	Observations	14	15
Image 7_Maximum intensity projection_C0.tif	757	371.002	0.49	1.448	56.684		Image 22_Maximum intensity projection_C0.tif	554	244.273	0.441	0.954	52.483	Hypothesized Mean Difference	0
Image 8_Maximum intensity projection_C0.tif	700	424.254	0.606	1.656	59.769		Image 23_Maximum intensity projection_C0.tif	473	168.842	0.357	0.659	54.848	df	26
Image 10_Maximum intensity projection_C0.tif	469	236.945	0.505	0.925	58.009		Image 24_Maximum intensity projection_C0.tif	695	392.01	0.564	1.53	62.936	t Stat	1.4874
Image 11_Maximum intensity projection_C0.tif	676	375.301	0.555	1.465	61.718		Image 25_Maximum intensity projection_C0.tif	581	256.194	0.441	1	55.882	P(T<=t) one-tail	0.0744685
Image 12_Maximum intensity projection_C0.tif	670	359.179	0.536	1.402	59.628		Image 26_Maximum intensity projection_C0.tif	637	288.829	0.453	1.128	58.889	t Critical one-tail	1.70562
Image 13_Maximum intensity projection_C0.tif	495	351.265	0.71	1.371	59.634		Image 27_Maximum intensity projection_C0.tif	408	175.29	0.43	0.684	55.368	P(T<=t) two-tail	0.148937
Image 14_Maximum intensity projection_C0.tif	511	296.255	0.58	1.157	62.191		Image 28_Maximum intensity projection_C0.tif	403	196.689	0.488	0.768	54.825	t Critical two-tail	2.05553
Image 15_Maximum intensity projection_C0.tif	571	336.902	0.59	1.315	59.66		Image 29_Maximum intensity projection_C0.tif	612	292.346	0.478	1.141	52.852
Average	576.643		0.546786				Image 30_Maximum intensity projection_C0.tif	627	276.126	0.44	1.078	59.838
SD	122.343		0.0676917				Average	510.933		0.445133
SEM	32.6975		0.0180914				SD	105.848		0.0435337			t-Test: Two-Sample Assuming Unequal Variances
							SEM	27.3298		0.0112404
														Variable 1	Variable 2
													Mean	0.546786	0.445133
													Variance	0.00493464	0.00203055
													Observations	14	15
													Hypothesized Mean Difference	0
													df	22
													t Stat	4.60232
													P(T<=t) one-tail	6.92803e-05
													t Critical one-tail	1.71714
													P(T<=t) two-tail	0.000138561
													t Critical two-tail	2.07387

## Sheet: day5 RFP
Control							dnj-21 RNAi
Slice	Count	Total Area	Average Size	%Area	Mean		Slice	Count	Total Area	Average Size	%Area	Mean
Image 17_Maximum intensity projection_C0.tif	487	264.499	0.543	1.033	62.108		Image 10_Maximum intensity projection_C0.tif	605	318.141	0.526	1.242	61.822	t-Test: Two-Sample Assuming Unequal Variances
Image 18_Maximum intensity projection_C0.tif	453	237.727	0.525	0.928	63.455		Image 11_Maximum intensity projection_C0.tif	469	229.128	0.489	0.895	59.531
Image 19_Maximum intensity projection_C0.tif	517	302.703	0.585	1.182	66.389		Image 12_Maximum intensity projection_C0.tif	462	227.076	0.492	0.887	56.288		Variable 1	Variable 2
Image 20_Maximum intensity projection_C0.tif	520	358.007	0.688	1.398	69.177		Image 13_Maximum intensity projection_C0.tif	458	205.385	0.448	0.802	55.648	Mean	512.875	494.333
Image 21_Maximum intensity projection_C0.tif	512	301.531	0.589	1.177	64.897		Image 14_Maximum intensity projection_C0.tif	270	117.153	0.434	0.457	54.073	Variance	10665	16029.7
Image 22_Maximum intensity projection_C0.tif	565	293.616	0.52	1.146	65.181		Image 15_Maximum intensity projection_C0.tif	431	238.899	0.554	0.933	56.182	Observations	8	15
Image 23_Maximum intensity projection_C0.tif	708	437.64	0.618	1.709	61.931		Image 1_Maximum intensity projection_C0.tif	417	185.843	0.446	0.726	50.054	Hypothesized Mean Difference	0
Image 24_Maximum intensity projection_C0.tif	341	227.467	0.667	0.888	69.2		Image 2_Maximum intensity projection_C0.tif	659	393.573	0.597	1.537	60.194	df	17
Average	512.875		0.591875				Image 3_Maximum intensity projection_C0.tif	453	256.487	0.566	1.001	58.05	t Stat	0.378341
SD	96.6015		0.0587887				Image 4_Maximum intensity projection_C0.tif	331	142.069	0.429	0.555	52.932	P(T<=t) one-tail	0.35493
SEM	34.1538		0.0207849				Image 5_Maximum intensity projection_C0.tif	658	300.749	0.457	1.174	59.964	t Critical one-tail	1.73961
							Image 6_Maximum intensity projection_C0.tif	468	230.789	0.493	0.901	57.534	P(T<=t) two-tail	0.70986
							Image 7_Maximum intensity projection_C0.tif	619	332.212	0.537	1.297	64.081	t Critical two-tail	2.10982
							Image 8_Maximum intensity projection_C0.tif	703	385.854	0.549	1.506	61.403
							Image 9_Maximum intensity projection_C0.tif	412	165.129	0.401	0.645	54.785
							Average	494.333		0.494533
							SD	122.315		0.0563204			t-Test: Two-Sample Assuming Unequal Variances
							SEM	31.5817		0.0145419
														Variable 1	Variable 2
													Mean	0.591875	0.494533
													Variance	0.00394984	0.00339855
													Observations	8	15
													Hypothesized Mean Difference	0
													df	13
													t Stat	3.62695
													P(T<=t) one-tail	0.00153477
													t Critical one-tail	1.77093
													P(T<=t) two-tail	0.00306954
													t Critical two-tail	2.16037

## Sheet: day0-day5 RFP
		0	1	2	3	4	5
	dnj-21 RNAi	0.4	212.571	506.438	623.125	576.643	512.875
	Ctrl.	2.625	37.7857	303.062	387	510.933	494.333
		0.227058	34.9187	40.6713	22.2775	32.6975	34.1538
		1.33134	9.17082	34.464	25.4586	27.3298	31.5817
		ns	***	***	***	ns	ns

## Sheet: day0 GFP
Control							dnj-21 RNAi
Slice	Count	Total Area	Average Size	%Area	Mean		Slice	Count	Total Area	Average Size	%Area	Mean
Image 1_Maximum intensity projection_C1.tif	0	0	NaN	0	NaN		Image 18_Maximum intensity projection_C1.tif	0	0	NaN	0	NaN	t-Test: Two-Sample Assuming Unequal Variances
Image 2_Maximum intensity projection_C1.tif	1	0.098	0.098	0.0003815	40		Image 19_Maximum intensity projection_C1.tif	0	0	NaN	0	NaN
Image 3_Maximum intensity projection_C1.tif	0	0	NaN	0	NaN		Image 20_Maximum intensity projection_C1.tif	0	0	NaN	0	NaN		Variable 1	Variable 2
Image 4_Maximum intensity projection_C1.tif	0	0	NaN	0	NaN		Image 21_Maximum intensity projection_C1.tif	0	0	NaN	0	NaN	Mean	0.533333	0.75
Image 6_Maximum intensity projection_C1.tif	0	0	NaN	0	NaN		Image 22_Maximum intensity projection_C1.tif	0	0	NaN	0	NaN	Variance	1.12381	1.53333
Image 7_Maximum intensity projection_C1.tif	0	0	NaN	0	NaN		Image 23_Maximum intensity projection_C1.tif	1	0.098	0.098	0.0003815	36	Observations	15	16
Image 8_Maximum intensity projection_C1.tif	3	0.782	0.261	0.003	40.056		Image 24_Maximum intensity projection_C1.tif	3	0.293	0.098	0.001	35.667	Hypothesized Mean Difference	0
Image 9_Maximum intensity projection_C1.tif	0	0	NaN	0	NaN		Image 25_Maximum intensity projection_C1.tif	0	0	NaN	0	NaN	df	29
Image 10_Maximum intensity projection_C1.tif	0	0	NaN	0	NaN		Image 26_Maximum intensity projection_C1.tif	0	0	NaN	0	NaN	t Stat	-0.524332
Image 11_Maximum intensity projection_C1.tif	3	1.075	0.358	0.004	37.111		Image 27_Maximum intensity projection_C1.tif	4	0.879	0.22	0.003	37.525	P(T<=t) one-tail	0.302016
Image 13_Maximum intensity projection_C1.tif	0	0	NaN	0	NaN		Image 28_Maximum intensity projection_C1.tif	1	0.098	0.098	0.0003815	36	t Critical one-tail	1.69913
Image 14_Maximum intensity projection_C1.tif	1	0.098	0.098	0.0003815	37		Image 29_Maximum intensity projection_C1.tif	2	0.391	0.195	0.002	36.75	P(T<=t) two-tail	0.604032
Image 15_Maximum intensity projection_C1.tif	0	0	NaN	0	NaN		Image 30_Maximum intensity projection_C1.tif	0	0	NaN	0	NaN	t Critical two-tail	2.04523
Image 16_Maximum intensity projection_C1.tif	0	0	NaN	0	NaN		Image 31_Maximum intensity projection_C1.tif	0	0	NaN	0	NaN
Image 17_Maximum intensity projection_C1.tif	0	0	NaN	0	NaN		Image 32_Maximum intensity projection_C1.tif	1	0.098	0.098	0.0003815	35
Average	0.533333						Image 33_Maximum intensity projection_C1.tif	0	0	NaN	0	NaN
SD	1.02415							0.75
SEM	0.264435							1.19896
								0.299739

## Sheet: day1 GFP
Control							dnj-21 RNAi
Slice	Count	Total Area	Average Size	%Area	Mean		Slice	Count	Total Area	Average Size	%Area	Mean
Image 1_Maximum intensity projection_C1.tif	9	1.368	0.152	0.005	37.611		Image 16_Maximum intensity projection_C1.tif	0	0	NaN	0	NaN	t-Test: Two-Sample Assuming Unequal Variances
Image 2_Maximum intensity projection_C1.tif	0	0	NaN	0	NaN		Image 17_Maximum intensity projection_C1.tif	0	0	NaN	0	NaN
Image 3_Maximum intensity projection_C1.tif	8	2.15	0.269	0.008	43.203		Image 18_Maximum intensity projection_C1.tif	0	0	NaN	0	NaN		Variable 1	Variable 2
Image 4_Maximum intensity projection_C1.tif	2	0.195	0.098	0.0007629	36		Image 19_Maximum intensity projection_C1.tif	0	0	NaN	0	NaN	Mean	7.42857	0.428571
Image 5_Maximum intensity projection_C1.tif	0	0	NaN	0	NaN		Image 20_Maximum intensity projection_C1.tif	1	0.098	0.098	0.0003815	36	Variance	52.5714	0.571429
Image 6_Maximum intensity projection_C1.tif	10	8.696	0.87	0.034	53.051		Image 21_Maximum intensity projection_C1.tif	1	0.098	0.098	0.0003815	37	Observations	14	14
Image 7_Maximum intensity projection_C1.tif	10	2.15	0.215	0.008	43.817		Image 22_Maximum intensity projection_C1.tif	2	1.173	0.586	0.005	39.045	Hypothesized Mean Difference	0
Image 8_Maximum intensity projection_C1.tif	16	21.301	1.331	0.083	59.073		Image 23_Maximum intensity projection_C1.tif	0	0	NaN	0	NaN	df	13
Image 9_Maximum intensity projection_C1.tif	5	2.736	0.547	0.011	43.537		Image 24_Maximum intensity projection_C1.tif	0	0	NaN	0	NaN	t Stat	3.59285
Image 10_Maximum intensity projection_C1.tif	10	11.725	1.173	0.046	59.894		Image 25_Maximum intensity projection_C1.tif	0	0	NaN	0	NaN	P(T<=t) one-tail	0.00163817
Image 11_Maximum intensity projection_C1.tif	7	3.713	0.53	0.014	52.427		Image 26_Maximum intensity projection_C1.tif	0	0	NaN	0	NaN	t Critical one-tail	1.77093
Image 12_Maximum intensity projection_C1.tif	0	0	NaN	0	NaN		Image 27_Maximum intensity projection_C1.tif	2	0.195	0.098	0.0007629	35	P(T<=t) two-tail	0.00327634
Image 14_Maximum intensity projection_C1.tif	26	17.197	0.661	0.067	48.772		Image 28_Maximum intensity projection_C1.tif	0	0	NaN	0	NaN	t Critical two-tail	2.16037
Image 15_Maximum intensity projection_C1.tif	1	0.098	0.098	0.0003815	38		Image 30_Maximum intensity projection_C1.tif	0	0	NaN	0	NaN
Average	7.42857							0.428571
SD	6.98687							0.728431
SEM	1.86732							0.194681

## Sheet: day2 GFP
Control							dnj-21 RNAi
Slice	Count	Total Area	Average Size	%Area	Mean		Slice	Count	Total Area	Average Size	%Area	Mean
Image 1_Maximum intensity projection_C1.tif	17	15.34	0.902	0.06	66.977		Image 17_Maximum intensity projection_C1.tif	8	3.713	0.464	0.014	52.147	t-Test: Two-Sample Assuming Unequal Variances
Image 2_Maximum intensity projection_C1.tif	2	0.195	0.098	0.0007629	48		Image 18_Maximum intensity projection_C1.tif	3	0.293	0.098	0.001	38.333
Image 3_Maximum intensity projection_C1.tif	13	11.921	0.917	0.047	60.864		Image 19_Maximum intensity projection_C1.tif	1	0.391	0.391	0.002	50.25		Variable 1	Variable 2
Image 4_Maximum intensity projection_C1.tif	12	12.8	1.067	0.05	51.632		Image 20_Maximum intensity projection_C1.tif	0	0	NaN	0	NaN	Mean	11.4375	1.6875
Image 5_Maximum intensity projection_C1.tif	5	4.397	0.879	0.017	42.296		Image 21_Maximum intensity projection_C1.tif	0	0	NaN	0	NaN	Variance	117.463	7.9625
Image 6_Maximum intensity projection_C1.tif	1	0.684	0.684	0.003	58.143		Image 22_Maximum intensity projection_C1.tif	0	0	NaN	0	NaN	Observations	16	16
Image 7_Maximum intensity projection_C1.tif	25	26.284	1.051	0.103	64.074		Image 23_Maximum intensity projection_C1.tif	1	0.391	0.391	0.002	36.5	Hypothesized Mean Difference	0
Image 8_Maximum intensity projection_C1.tif	20	17.783	0.889	0.069	53.232		Image 24_Maximum intensity projection_C1.tif	9	4.983	0.554	0.019	53.287	df	17
Image 9_Maximum intensity projection_C1.tif	0	0	NaN	0	NaN		Image 25_Maximum intensity projection_C1.tif	2	0.293	0.147	0.001	39	t Stat	3.48235
Image 10_Maximum intensity projection_C1.tif	7	1.27	0.181	0.005	40.714		Image 26_Maximum intensity projection_C1.tif	0	0	NaN	0	NaN	P(T<=t) one-tail	0.00142553
Image 11_Maximum intensity projection_C1.tif	2	2.443	1.221	0.01	68.732		Image 27_Maximum intensity projection_C1.tif	0	0	NaN	0	NaN	t Critical one-tail	1.73961
Image 12_Maximum intensity projection_C1.tif	0	0	NaN	0	NaN		Image 28_Maximum intensity projection_C1.tif	0	0	NaN	0	NaN	P(T<=t) two-tail	0.00285106
Image 13_Maximum intensity projection_C1.tif	28	24.72	0.883	0.097	50.467		Image 29_Maximum intensity projection_C1.tif	1	0.098	0.098	0.0003815	47	t Critical two-tail	2.10982
Image 14_Maximum intensity projection_C1.tif	6	3.811	0.635	0.015	50.083		Image 30_Maximum intensity projection_C1.tif	2	1.466	0.733	0.006	48.438
Image 15_Maximum intensity projection_C1.tif	35	34.687	0.991	0.135	57.632		Image 31_Maximum intensity projection_C1.tif	0	0	NaN	0	NaN
Image 16_Maximum intensity projection_C1.tif	10	7.133	0.713	0.028	38.05		Image 32_Maximum intensity projection_C1.tif	0	0	NaN	0	NaN
Average	11.4375						Average	1.6875
SD	10.4939						SD	2.73219
SEM	2.62346						SEM	0.683047

[truncated: 4 more sheets: day3 GFP, day4 GFP, day5 GFP, day0-day5 GFP]
