# Supplementary material for: Cytosolic aggregation of mitochondrial proteins disrupts cellular homeostasis by stimulating the aggregation of other proteins
Source: eLife. 2021 Jul 20;10:e65484. doi: 10.7554/eLife.65484 (PMC8457837; doi:10.7554/eLife.65484)
Supplement: Figure 5—source data 2. [file elife-65484-fig5-data2.xlsx]

## Sheet: FIg5D
																												0409 WT N2 dnj-21 RNAi	0409 WT N2 EV_1	0409 WT N2 EV_2
	exp 2808
	Average BMP	SEM	Worms counted
YFP EV	53.9087	2.39411	270
YFP dnj-21 RNAi	46.8182	2.50763	300
PD EV	46.4698	2.13	339
PD dnj-21 RNAi	35.0656	1.15856	777
	exp 2808
	Average speed	SEM	Worms counted
YFP EV	0.044831	0.001891	270
YFP dnj-21 RNAi	0.033829	0.001618	300
PD EV	0.034632	0.001818	339
PD dnj-21 RNAi	0.018576	0.000556	777

## Sheet: Fig 5F
	Level of beta amyloids Native PAGE
		MJS190	MJS191	MJS192	MJS193	MJS194	MJS196	avg	sd
	ev 20˚C	1	1	1	1			1	0
	dnj-21 RNAi 20˚C	2.68822	0.85687	0.992679	1.1416			0.997051	0.142416
	ev 22˚C				1	1	1	1
	dnj-21 RNAi 22˚C				1.97716	1.29914	2.16734	1.81455	0.45637
	ev 25˚C	1	1	1	1			1	0
	dnj-21 RNAi 25˚C	1.27282	1.57871	2.52477	1.10306			1.61984	0.63458

## Sheet: Fig5G
		motility in strain expressing beta amyloid and gfp
	ev 20˚C	dnj-21 RNAi 20˚C	ev 22˚C	dnj-21 RNAi 22˚C	ev 25˚C	dnj-21 RNAi 25˚C
mjs198	140	150	142	94	92	110
	134	128	158	110	108	110
	140	130	132	110	116	94
	142	164	160	112	100	102
	146	146	120	126	114	114
	150	140	116	98	92	104
	140	134	118	124	92	120
	136	134	128	102	60	112
	150	130	130	110	118	96
	132	120	120	104	106	108
mjs199	156	130	120	118	114	110
	148	126	116	110	84	106
	144	110	140	120	88	100
	154	146	132	96	74	120
	166	120	136	118	84	44
	140	118	140	102	62	70
	150	156	126	122	82	100
	92	142	120	92	100	76
	154	130	102	122	106	106
	140	134	130	120	84	82
	144	122	130	94	72	92
	106	132	120	98	38	82
	134	148	136	108	82	96
	166	140	138	116	106	78
	142	162	112	112	100	84
	142	148	120	112	102	52
	140	146	124	92	76	60
	144	144	140	94	82	88
	158	154	128	124	84	82
	136	142	132	104	86	78
mjs200	156	130	120	118	114	110
	148	126	116	110	84	106
	144	110	140	120	88	100
	154	146	132	96	74	120
	166	120	136	118	84	44
	140	118	140	102	62	70
	150	156	126	122	82	100
	92	142	120	92	100	76
	154	130	102	122	106	106
	140	134	130	120	84	82
	144	122	130	94	72	92
	106	132	120	98	38	82
	134	148	136	108	82	96
	166	140	138	116	106	78
	142	162	112	112	100	84
	142	148	120	112	102	52
	140	146	124	92	76	60
	144	144	140	94	82	88
	158	154	128	124	84	82
	136	142	132	104	86	78
avg	142.44	137.52	128.16	108.76	88.2	89.64
st dv	15.7599	13.3619	11.6187	10.8789	17.8257	19.5487
t-test	0.0477056		5.97126e-14		0.35058

## Sheet: S_Fig_5G
Level lof beta amyloids - SDS-PAGE
	MJS190	MJS191	MJS192	MJS193	MJS194	MJS196	avg	sd
ev 20˚C	1	1	1	1			1	0
dnj-21 RNAi 20˚C	1.38234	1.16904	1.09832	1.01344			1.16578	0.157766
ev 22˚C				1	1	1	1
dnj-21 RNAi 22˚C				1.1599	1.0303	0.929104	1.03977	0.115687
ev 25˚C	1	1	1				1	0
dnj-21 RNAi 25˚C	1.02663	1.54873	1.58998				1.38844	0.31402

## Sheet: SFig_5H
	strain expressing GFP
	temperature of culture
experiment number:	20 degrees			22 degrees			25degrees
mjs202	ev	dnj21		ev	dnj-21 RNAi		ev	dnj21
	160	122	mjs203	140	118	mjs206	120	116
	120	112		120	126		116	96
	120	110		114	122		78	108
	94	102		104	104		104	114
	122	130		118	106		104	112
	112	124		100	120		112	110
	116	110		116	110		114	102
	112	108		134	104		120	110
	106	116		126	110		114	116
	102	120		126	106		112	116
mjs206	106	120		126	122		124	92
	118	120		130	120		116	120
	132	110		124	118		120	98
	112	110		106	128		112	114
	120	122		122	120		112	104
	104	112		104	104		100	90
	98	120		124	116		112	106
	110	126		104	98		100	106
	98	104		98	106		118	104
	114	102		106	128		104	90
	108	104		88	116
	126	98		124	122
	114	96		116	108
	110	106		118	114
	126	116		116	118
			mjs204	112	96
				106	108
				96	108
				112	108
				114	100
				120	96
				102	110
				112	84
				120	114
				98	70
				110	116
				86	116
				80	110
				106	120
				118	118
				106	126
				110	104
				134	116
				106	96
				118	98
			mjs206	110	102
				122	94
				120	124
				136	124
				110	120
				114	124
				114	110
				108	110
				112	124
				112	94
				106	110
				100	116
				112	92
				106	120
				106	100
avg	114.4	112.8		112.633	110.7		110.6	106.2
sd	13.3542	9.09212		11.7689	11.5792		10.2823	9.15136
